# Supplementary material
Source: MDPI journal article supplement (https://www.mdpi.com/2220-9964/11/3/197)
Supplement: s1 [file s1]

Table S1. Prevailing soil type list

| ID  | Description                                                                                   | Name in the FAO system, 1988 |
|-----|-----------------------------------------------------------------------------------------------|------------------------------|
| 38  | Sod-podzolics, mainly shallow and non-deep podzolics                                          | Eutric Podzoluvisols         |
| 39  | Sod-podzolics, mainly rather shallow podzolics                                                | Eutric Podzoluvisols         |
| 42  | Sod-podzolics (without subdivision)                                                           | Eutric Podzoluvisols         |
| 44  | Sod-podzolics with the second humic horizon                                                   | Eutric Podzoluvisols         |
| 50  | Sod-podzolics illuvial-ferruginous                                                            | Eutric Podzoluvisols         |
| 62  | Podzols gleyic peaty and peat                                                                 | Gleyic Podzols               |
| 83  | Sod-calcareouses                                                                              | Rendzic Leptosols            |
| 102 | Light-grey forest                                                                             | Eutric Podzoluvisols         |
| 103 | Grey forest                                                                                   | Haplic Greyzems              |
| 104 | Dark-grey forest                                                                              | Haplic Greyzems              |
| 107 | Grey forest residual-calcareous                                                               | Haplic Greyzems              |
| 113 | Grey forest shallow                                                                           | Eutric Leptosols             |
| 115 | Pine forest sands                                                                             | Cambic Arenosols             |
| 116 | Chernozems podzolized                                                                         | Luvic Phaeozems              |
| 117 | Chernozems leached                                                                            | Haplic Chernozems            |
| 118 | Chernozems typical                                                                            | Haplic Chernozems            |
| 119 | Chernozems ordinary                                                                           | Calcic Chernozems            |
| 120 | Chernozems southern                                                                           | Haplic Chernozems            |
| 130 | Chernozems residual-calcareous                                                                | Haplic Chernozems            |
| 132 | Chernozems solonetzic                                                                         | Luvic Chernozems             |
| 134 | Chernozems without subdivision, mainly shallow                                                | Mollic Leptosols             |
| 136 | Meadow-chernozemics                                                                           | Haplic Chernozems            |
| 143 | Dark chestnuts                                                                                | Haplic Kastanozems           |
| 144 | Chestnuts                                                                                     | Haplic Kastanozems           |
| 150 | Dark-chestnuts residual-calcareous and calcarious                                             | Calcic Kastanozems           |
| 151 | Dark chestnuts solonetzic and solonchakous                                                    | Luvic Kastanozems            |
| 152 | Chestnuts solonetzic and solonchakous                                                         | Luvic Kastanozems            |
| 153 | Light chestnuts solonetzic and solonchakous                                                   | Haplic Kastanozems           |
| 154 | Chestnuts shallow                                                                             | Mollic Leptosols             |
| 166 | Peats low moor                                                                                | Fibric Histosols             |
| 188 | Alluvials saturated                                                                           | Eutric Fluvisols             |
| 261 | Chernozems solonetz and solonzemes (automorphic)                                              |                              |
| 267 | Light chestnut solonetz and solonchak, meadow-solonetz (semihydromorphic) and meadow-chestnut |                              |
| 279 | Meadow (semi-hydromorphic), light chestnut solonchaks and meadow-chestnut solonetz            |                              |
| 288 | Meadow-grass (semi-hydromorphic) and meadow-chestnut solonetz.                                |                              |
| 290 | Meadow-chernozem and meadow-soddy solonetz (semihydromorphic)                                 |                              |
| 293 | Chestnut solonetz and solonetz (automorphic)                                                  |                              |
| 307 | Water areas                                                                                   |                              |

Table S2. Prevailing type of soil-forming rocks list

| ID | Description                                                                                 |
|----|---------------------------------------------------------------------------------------------|
| 1  | Clayey and heavy loamy                                                                      |
| 4  | Middle-loamy                                                                                |
| 7  | Light loamy                                                                                 |
| 10 | Sandy                                                                                       |
| 13 | Gravelly sandy                                                                              |
| 16 | Clay and loamy, underlain by sandy and sandy loam rocks                                     |
|    | Frequent change of rocks of different mechanical composition with predominance of loams and |
| 20 | clays                                                                                       |
| 25 | Shales                                                                                      |
| 28 | Sandstones                                                                                  |
| 29 | Opoks                                                                                       |
| 30 | Limestones and other carbonate rocks                                                        |
